# Supplementary material for: Influence of urban pollution on the production of organic particulate matter from isoprene epoxydiols in central Amazonia
Source: Copernicus journal article supplement (doi:10.5194/acp-2016-1020), 2016-12-13
Supplement: Supplementary file 1 [file acp-2016-1020-supplement.pdf]

## Supplementary Material

### **Influence of urban pollution on the production of organic particulate matter from isoprene epoxydiols in central Amazonia**

Suzane S. de Sá (1), Brett B. Palm (2), Pedro Campuzano-Jost (2), Douglas A. Day (2), Matthew K. Newburn (3), Weiwei Hu (2), Gabriel Isaacman-VanWertz<sup>a</sup> (4), Lindsay D. Yee (4), Ryan Thalman (5), Joel Brito<sup>b</sup> (6), Samara Carbone (6), Paulo Artaxo (6), Allen H. Goldstein (4), Antonio O. Manzi (7), Rodrigo A.F. Souza (8), Fan Mei (9), John E. Shilling (3,9), Stephen R. Springston (5), Jian Wang (5), Jason D. Surratt (10), M. Lizabeth Alexander (3), Jose L. Jimenez (2), Scot T. Martin\* (1, 11)

- (1) School of Engineering and Applied Sciences, Harvard University, Cambridge, Massachusetts, USA
- (2) Department. of Chemistry & Biochemistry and Cooperative Institute for Research in Environmental Sciences, University of Colorado, Boulder, Colorado, USA
- (3) Environmental Molecular Sciences Laboratory, Pacific Northwest National Laboratory, Richland, Washington, USA
- (4) Dept. of Environmental Science, Policy, and Management, University of California, Berkeley, California, USA
- (5) Brookhaven National Laboratory, Upton, New York, USA
- (6) Departamento de Física Aplicada, Universidade de São Paulo, São Paulo, Brasil
- (7) Instituto Nacional de Pesquisas da Amazonia, Manaus, Amazonas, Brasil
- (8) Escola Superior de Tecnologia, Universidade do Estado do Amazonas, Manaus, Amazonas, Brasil
- (9) Atmospheric Sciences and Global Change Division, Pacific Northwest National Laboratory, Richland, WA, USA
- (10) Department of Environmental Sciences and Engineering, Gillings School of Global Public Health, The University of North Carolina at Chapel Hill, Chapel Hill, North Carolina, USA
- (11) Department of Earth and Planetary Sciences, Harvard University, Cambridge, Massachusetts, USA

<sup>a</sup> Now at Massachusetts Institute of Technology, Cambridge, Massachusetts, USA

<sup>b</sup> Now at: Laboratory for Meteorological Physics (LaMP), University Blaise Pascal, Aubière, France

## 1 **S1. Instrumentation**

### 2 **S1.1 Aerosol Mass Spectrometry: set up and operation**

3 Online measurements of organic and sulfate mass concentrations measured in this study  
4 were made by a High-Resolution Time-of-Flight Aerosol Mass Spectrometer (AMS, Aerodyne  
5 Research Inc.) (DeCarlo et al., 2006; Canagaratna et al., 2007). The AMS provided real-time  
6 measurements of bulk non-refractory particle chemical composition (organic, sulfate, nitrate,  
7 ammonium, chloride) and chemically resolved mass-diameter distribution. Air was sampled  
8 through a critical orifice and enters an aerodynamic lens, which focused the submicron particles  
9 into a narrow beam (Zhang et al., 2004). Particles traveled through a sizing chamber to reach a  
10 porous tungsten inverted-cone vaporizer at 600 °C, and non-refractory components volatilized.  
11 The gaseous molecules were then ionized through electron impact (70 eV), and the ions were  
12 measured by time-of-flight mass spectrometry. The high mass resolution allowed for the  
13 distinction of ions having the same nominal mass but different elemental composition. Data  
14 analysis was performed using standard AMS software (*SQUIRREL* 1.56D, *PIKA* 1.14G)  
15 (webpage: [http://cires1.colorado.edu/jimenez-](http://cires1.colorado.edu/jimenez-group/ToFAMSResources/ToFSoftware/index.html)  
16 [group/ToFAMSResources/ToFSoftware/index.html](http://cires1.colorado.edu/jimenez-group/ToFAMSResources/ToFSoftware/index.html)).

17 Aerosol particles were sampled through a cyclone (URG-2000-30EH) which had a size  
18 cut of 2.5  $\mu\text{m}$  for a flow of 16.7  $\text{L min}^{-1}$ . The sampled flow (14.9 to 16.3  $\text{L min}^{-1}$ ) traveled  
19 through a stainless steel tube for about 1.5 m. The flow was then split in two: a 4-m line for  
20 sampling (1.2 or 2.6  $\text{L min}^{-1}$ ) and a line (13.7  $\text{L min}^{-1}$ ) for exhaust. The sampling flow changed  
21 between 1.2 and 2.6  $\text{L min}^{-1}$  according to the flow set up of the Scanning Mobility Particle Sizer  
22 (SMPS), which was sampling in parallel to the AMS. The sampling flow then entered a poly-  
23 tube Nafion dryer (Perma Pure, model PD-100T). Drying prior to entering the instrument

24 container aimed at avoiding water condensation in the line inside the container, which was  
25 always kept at lower temperatures than outside (i.e., trailer temperature was around 23 °C during  
26 daytime). RH measured after the poly-tube dryer and inside the container was at 40 to 80%.  
27 Within the container, a subflow (0.6 or 3 L min<sup>-1</sup>) was passed through a mono-tube Nafion dryer  
28 (Perma Pure, model MD-110) to reach RH < 40%. A flow of 0.09 L min<sup>-1</sup> was sampled by the  
29 AMS, and the remaining flow of 0.5 or 2.9 L min<sup>-1</sup> was sampled by the SMPS. The ambient air  
30 sampling line was integrated to a valve switching system, which alternated the AMS/SMPS  
31 sampling between the unprocessed ambient air and air processed by oxidation flow reactors or a  
32 thermal denuder. The unprocessed ambient air (used for this analysis) was sampled for 4 out of 8  
33 min, constituting half of the total acquired data set.

34         Due to expected low mass concentrations and to secondary need for the low-sensitivity  
35 high-resolution data, the AMS was operated for most of the time in medium-resolution V-mode  
36 ( $\Delta m/m = 2200$  at  $m/z$  44), which was used for mass quantification. High-resolution W-mode  
37 ( $\Delta m/m = 4000$  at  $m/z$  44) was acquired for one of every six days. These data were used to aid  
38 choice of ions to fit. When only V-mode data were acquired, the instrument was operated in  
39 “mass spectrum” sub-mode for 180 s and in “particle-time-of-flight” sub-mode for 60 s. When  
40 W-mode data were also collected, the “W-mass-spectrum” sub-mode was operated for 60 s, the  
41 “V-mass-spectrum” sub-mode ran for 120 s, and “V-particle-time-of-flight” sub-mode ran for 60  
42 s. Both ways of operation corresponded to 4 min for each cycle, allowing for synchronization to  
43 the valve switching system.

44         The AMS sensitivity and the ammonium relative ionization efficiency (RIE) were  
45 calibrated every five days using dried ammonium nitrate particles having a mobility diameter of  
46 400 nm. An interpolated curve of the obtained values, corresponding to  $RIE = 4.3 \pm 0.2$ , was

47 used for mass calculation corrections. The sulfate RIE was calibrated using ammonium sulfate a  
48 few times during the campaign, and the average value of  $0.9 \pm 0.1$  was applied to the entire  
49 campaign. The collection efficiency (CE) was determined as 1.0 for IOP1 according to volume  
50 comparison to the two co-located Scanning Mobility Particle Sizers (Figure S6). Volume of  
51 black carbon (BC) accounted for  $8 \pm 6$  % of the total volume measured by SMPS, for an  
52 assumed density of  $1.8 \text{ g cm}^{-3}$  for BC. Since BC data were limited, the abscissa of Figure S6 was  
53 not subtracted by BC contribution. This CE value was consistent with that used for the AMAZE-  
54 08 in the wet season of 2008 (Chen et al., 2009).

## 55 **S1.2 Semi-Volatile Thermal desorption Aerosol Gas Chromatography: set up and** 56 **operation**

57 Online measurements of organic tracer compounds in the particle and gas phases were  
58 made by a Semi-Volatile Thermal desorption Aerosol Gas chromatograph (SV-TAG). This  
59 instrument is described in detail elsewhere (Isaacman et al., 2014). Its operation is briefly  
60 presented here.

61 Air was sampled at  $20 \text{ L min}^{-1}$  from the center stream of a flow of  $200 \text{ L min}^{-1}$  through a  
62  $15.24 \text{ cm}$  (OD) stainless steel duct at a height of approximately  $5 \text{ m}$  above ground level. The  
63 flow was then divided into two channels, passing through a PM1 cyclone at  $10 \text{ L min}^{-1}$ , each  
64 containing a custom Filter Collection and Thermal Desorption cell (F-CTD). The F-CTD  
65 quantitatively collected and retained both particle- and gas-phase compounds. A multi-channel  
66 carbon denuder (MAST Carbon) was used to remove all gases upstream of one collection cell. In  
67 this way, two samples were simultaneously collected: a “particle” sample and a “total” gas-plus-  
68 particle sample. Samples were thermally desorbed from the cells subjected to a ramping  
69 temperature from  $30$  to  $310 \text{ }^\circ\text{C}$  ( $35 \text{ }^\circ\text{C min}^{-1}$ ) into a helium stream that was 80% saturated with

70 MSTFA (N-Methyl-N-(trimethylsilyl) trifluoroacetamide). Hydroxyl groups were converted into  
71 silyl esters and ethers. Analytes were transferred to the GC column, and the sample was analyzed  
72 through a commercially available GC/MS (7890A/5975C; Agilent Technologies). The  
73 chromatographic data were analyzed using the publicly available software *TAG ExploreR and*  
74 *iNtegration* (Isaacman-VanWertz and Sueper).

75 Compounds were quantified using isotopically labeled internal standards to correct for  
76 run-to-run variability in sample transfer efficiency and instrument response. Regular multi-point  
77 calibrations were made of approximately 100 authentic standards. Pentaerythritol-2-<sup>13</sup>C was used  
78 for 2-methyltetrols and C<sub>5</sub>-alkene triols. The uncertainty in mass concentration was  
79 approximately 15% (Isaacman et al., 2014). C<sub>5</sub>-alkene triols were quantified using the calibration  
80 factor of 2-methyltetrols under the assumption of an identical total ion response. An absence of  
81 an authentic standard results in unconstrained uncertainty in mass concentration of 30 of 50%  
82 (Jaoui et al., 2005).

### 83 **S1.3 NO<sub>y</sub> measurements**

84 The NO<sub>y</sub> measured included the following species: NO, NO<sub>2</sub>, HNO<sub>3</sub>, particle nitrate,  
85 RNO<sub>3</sub>, and PAN. Measurements were made by a custom analyzer designed by Air Quality  
86 Design (AQD; <http://www.airqualitydesign.com>). The analyzer was based on two commercial  
87 oxides of nitrogen detectors made by Thermo Scientific (Model 42i TLE) and extensively  
88 modified by AQD. An external, temperature-controlled inlet box was mounted at 10 m above  
89 ground level.

90 The instrument contained both a research grade LED photolysis cell for converting NO<sub>2</sub>  
91 into NO and a heated molybdenum converter for converting total NO<sub>y</sub> into NO. One channel,  
92 leading from the photolysis cell to one 42i TLE detector, alternated every minute between NO

93 and  $\text{NO}_x$  by switching the LED photolysis cell on/off. The other channel, leading from the  
94 molybdenum converter to the second 42i TLE detector, measured total  $\text{NO}_y$ . The detectors  
95 internally measured zero based on pre-reaction of the sample with ozone. Instrument response  
96 was measured by addition of  $\text{NO}$  in zero air at the sampling point (10 m). Converter efficiency  
97 was measured by gas-phase titration of the  $\text{NO}$  standard to  $\text{NO}_2$ . An  $\text{HNO}_3$  source was sampled  
98 every other day. The calibration unit was a Thermo Scientific Model 146i calibrator equipped  
99 with gas-phase titration and a permeation oven. The raw  $\text{NO}_y$  measurements, reported at a  
100 resolution of 10 s, were averaged into bins of 30 min to filter for local events not representative  
101 of the larger scale chemical processes that form the scope of this study.

## 102 **S2. Positive Matrix Factorization and the IEPOX-SOA factor**

103 The time series of mass spectra of organic material measured by the AMS was analyzed  
104 by positive matrix factorization (PMF) using a standard analysis toolkit (Ulbrich et al., 2009).  
105 High-resolution, V-mode data were used. The PMF solution was based on minimization of the  
106 “Q-value” or “PMF quality-of fit parameter”, meaning the sum of the weighed squared residuals  
107 for a chosen number of factors. The interpretation of the physical significance of the AMS PMF  
108 factors took into account correlations with quantities simultaneously measured by other  
109 instruments. The solution consisted of six factors, and the present study focuses on one of the  
110 derived factors, labeled “IEPOX-SOA”. de Sá (in preparation) focuses on presentation of the  
111 other factors.

112 The profile of the resolved IEPOX-SOA factor is shown in Figure S1. A key  
113 characteristic is intensity at  $\text{C}_5\text{H}_6\text{O}^+$  ( $m/z$  82) (Hu et al., 2015). In addition, a prominent signal at  
114  $\text{C}_4\text{H}_5^+$  ( $m/z$  53) is observed, which has also been reported as characteristic of the IEPOX-SOA  
115 factor (Hu et al., 2015). The IEPOX-SOA factor is also relatively highly oxidized, as expressed

116 by  $f_{44} = 0.15$  and oxygen to carbon atomic ratio O:C = 0.80, applying the calibration described in  
117 Canagaratna et al. (2015).

118 Technical diagnostics of the six-factor solution are presented in Figure S2 and more  
119 extensively described in (de Sá, in preparation). Panel b shows the quality of fit parameter  
120  $Q/Q_{expected}$  (Ulbrich et al., 2009) as a function of the number of factors, suggesting that the  
121 solution should have at least three factors. Panel a shows a great reduction in the structure of the  
122 total residuals when going from the five-factor to the six-factor solution. The six-factor solution  
123 also offered more meaningful factor profiles (“mass spectra”) (de Sá, in preparation). Panel c  
124 shows  $Q/Q_{expected}$  as a function of the rotational ambiguity parameter  $f_{peak}$  (Ulbrich et al., 2009)  
125 for the six-factor solution. A plausible range for  $f_{peak}$  was determined according to the best  
126 practice of limiting  $Q/Q_{expected}$  to a value that does not exceed 0.1% of the minimum value  
127 (occurring at  $f_{peak} = 0$ ). The default value of  $f_{peak} = 0$  was chosen for the final six-factor solution,  
128 since no significant improvements in the external validation of the factors were observed.  
129 Moreover, the IEPOX-SOA factor resolved in the six-factor solution had a very robust time trend  
130 across a range of rotations in the solution (Figure S2d). As  $f_{peak}$  varied, the correlation of factor  
131 loading with C5-alkene triols concentrations remained approximately constant, even as some  
132 features of the factor profile changed significantly, such as the relative signals of  $C_5H_6O^+$  and  
133  $CO_2^+$ , respectively  $f(C_5H_6O)$  and  $f(CO_2)$ , as well as the magnitude of factor loadings and  
134 consequently the ratio  $f$ .

135 The loading of the IEPOX-SOA factor may be an overestimate or an underestimate of the  
136 atmospheric concentration of the IEPOX-derived PM (brown dashed lines in Figure 1). In  
137 respect to overestimate, the AMS mass spectrum observed in laboratory studies for the uptake of  
138 IEPOX by acidic sulfate particles is statistically equal to that obtained for the uptake of isoprene

139 photo-oxidation products, yet IEPOX accounted for only half of those products (Liu et al., 2015).  
140 The implication is that the uptake of non-IEPOX species can lead to a similar AMS spectrum.  
141 Pathways of PM production from condensation of multifunctional hydroperoxides lead to a  
142 distinct mass spectrum from IEPOX pathways, and are not expected to be highly active under the  
143 acidic particle conditions of these experiments (Riva et al., 2016), leaving a large mass fraction  
144 of produced PM unexplained. The combination of AMS vaporization at 600 °C and ionization by  
145 electron impact at 70 eV may convert IEPOX-derived and non-IEPOX-derived molecules into  
146 similar groups of ions, which then give rise to a similar mass spectrum. The SV-TAG, which  
147 uses desorption temperatures up to 310 °C and thus can also induce thermal decomposition of  
148 some molecules, might also result in an in-common analyte (i.e., tracer) between IEPOX-derived  
149 and non-IEPOX-derived molecules, thereby precluding a constraint on any possible overestimate  
150 by the AMS factor (Isaacman-VanWertz et al., 2016; Lopez-Hilfiker et al., 2016). For these  
151 reasons, the loading of the IEPOX-SOA factor might overestimate IEPOX-derived PM  
152 concentrations by accounting for other isoprene oxidation products that are not produced through  
153 the IEPOX intermediate.

154 In respect to underestimate, the loading of the IEPOX-SOA factor may not capture the  
155 entire particle-phase carbon footprint that originated from IEPOX uptake. Extensive atmospheric  
156 processing, such as reactions with hydroxyl radicals or photolysis, can partly eliminate the initial  
157 products of IEPOX uptake (Kroll et al., 2009; Bateman et al., 2011; Epstein et al., 2014; Hu et  
158 al., 2015; Hu et al., 2016). The IEPOX-originated carbon can still be inside the particle, yet it no  
159 longer contributes to the loading of the IEPOX-SOA factor because of an altered mass spectrum  
160 for some molecules. Atmospheric reactions gradually homogenize particle composition and  
161 properties, and the AMS spectra can become more uniform (Jimenez et al., 2009). Specifically,



162 the ratio of signal intensity at  $m/z$  44 to that at  $m/z$  43 increases, and the relative intensity of  $m/z$   
163 82 decreases (Ng et al., 2011; Hu et al., 2015). This modified organic material, which originally  
164 entered the particle phase through IEPOX uptake, may then contribute to the loading of PMF  
165 factors other than IEPOX-SOA, such as the oxidized organic factors broadly labeled as “OOA”  
166 (Zhang et al., 2005). For these several reasons, the IEPOX-SOA factor loading might be an  
167 underestimate of IEPOX-derived PM concentrations.

### 168 **S3. Comparison of background and polluted cases**

169 The presence of a pollution plume at T3 is indicated by a combination of several external  
170 measured variables, including particle number, ozone, and  $\text{NO}_y$  concentrations. The definition of  
171 background and polluted cases aimed at selecting afternoons that were associated with extreme  
172 values of those variables. Conditions entailing concentration of ozone at around 10 ppb or less,  
173 particle number concentration of less than  $500 \text{ cm}^{-3}$ , and  $\text{NO}_y$  concentrations of less than 1 ppb  
174 were collectively a strong indicative of a background case. Conditions including ozone  
175 concentrations upward of 30 ppb, particle number concentration above  $2000 \text{ cm}^{-3}$ , and  $\text{NO}_y$   
176 concentrations around 1.5 ppb or above indicated pollution. Measurements of these variables  
177 onboard the G-1 aircraft confirmed what the ground measurements suggested on the several days  
178 that the G-1 flew overhead.

179 Examples of these supporting data are illustrated in Figure 3 for the chosen background  
180 and polluted days (March 3 and 13, 2014, respectively) composing the primary case study  
181 analyzed in the main text. A few other afternoons, representative of these two extremes of  
182 background and polluted cases, were selected from the campaign time series and are depicted in  
183 Figure S4. The top panel shows cases of background conditions, and the bottom panel shows  
184 cases of polluted conditions. The local wind direction observed for the polluted cases generally

185 characterized by easterlies, as consistent with Manaus direction, whereas for the background  
186 cases it tends to diverge from that prevailing direction. The cases within each category are  
187 ordered from left to right in ascending order of IEPOX-SOA factor loadings.

188 Sulfate concentrations had a wide range of values, even for background conditions  
189 (Figure S4), as discussed in the main text. Meteorological conditions such as overcast (lower  
190 photooxidation activity) and rain events (higher wet deposition), as seen on March 20 and March  
191 23, are some of the factors that control particle number and mass concentration (sulfate and  
192 organic compounds). These factors help to explain the natural variability in sulfate mass  
193 concentration. By comparison, on a sunny day, with winds mostly coming from the northeast  
194 direction, as exemplified by February 16 and March 3, sulfate mass concentrations can be around  
195  $0.3 \mu\text{g m}^{-3}$  or more, values which are also typical of some polluted days (bottom panel). Both the  
196 factor loading and the ratio  $f$  increased with increasing sulfate (rows 2 and 3 of top panel), when  
197  $\text{NO}_y$  levels were approximately the same. A comparison of February 16 and March 3 shows in  
198 addition the importance of  $\text{NO}_y$  concentration: for similar concentrations of sulfate and organic  
199 PM and similar meteorological conditions, the case having lower  $\text{NO}_y$  concentrations (0.4 to 0.5  
200 ppb on March 3 as compared to 0.7 to 0.8 ppb on February 16) was associated with considerably  
201 higher absolute and relative factor loadings.

202 For the polluted cases shown in Figure S4,  $\text{NO}_y$  concentrations were variable between  
203 and within cases, ranging from 1 ppb up to 7 ppb. Larger sulfate mass concentrations (from left  
204 to right) were associated with larger absolute and relative factor loadings, analogous to what was  
205 observed for background cases. A comparison between March 3 and 13 (i.e., background and  
206 polluted; Figure 4) shows that for similar sulfate concentrations but higher  $\text{NO}_y$  levels March 13  
207 had considerably lower factor loadings. The case of February 9 (polluted) illustrates that the

208 factor loadings did not exceed  $0.4 \mu\text{g m}^{-3}$  and  $f$  did not exceed 0.2 even at rarely high sulfate  
209 concentrations in the wet season, reaching  $0.9 \mu\text{g m}^{-3}$ . This finding is attributed to the high NO  
210 concentrations, as implied by NO<sub>y</sub> concentrations of 3 ppb and greater, that suppressed IEPOX  
211 production.

212         These cases illustrate the possible wide range of observed sulfate mass concentrations  
213 under background conditions, in great part overlapping with typical values of polluted  
214 conditions. The cases also demonstrate that the trend in observed IEPOX-SOA factor loadings  
215 and ratio  $f$ , both within each category (background or polluted conditions) and between them, can  
216 be consistently explained by the roles that sulfate and NO exert on the production of IEPOX-  
217 derived PM.

#### 218 **S4. Sulfate and particle acidity estimates in the context of field studies**

219         The underlying relative importance of direct compared to indirect roles of sulfate on the  
220 formation of IEPOX-derived PM is not well understood. Sulfate can play a direct role as a  
221 nucleophile in the reaction of formation of organosulfates from IEPOX (Surratt et al., 2007b;  
222 Nguyen et al., 2014). Organosulfates, however, are believed to constitute only a fraction of the  
223 IEPOX-derived PM (Hu et al., 2015). Particle acidity, an indirect effect of sulfate, has been  
224 shown to drive IEPOX-derived PM production in several lab studies (Surratt et al., 2007a;  
225 Kuwata et al., 2015; Lewandowski et al., 2015). Nevertheless, the acidity effect observed in  
226 laboratories is not as clearly observed in field studies, wherein pH estimates have typically been  
227 employed as a proxy for acidity (Budisulistiorini et al., 2013; Lin et al., 2013; Worton et al.,  
228 2013; Budisulistiorini et al., 2015; Xu et al., 2015). The present study corroborates those findings  
229 and further argues that this apparent conflict can be reasoned by taking into account that both the  
230 estimate and the end-use of pH may be problematic in the context of field studies.

231 Firstly, a reliable estimate of pH is often hard to obtain. In the case of the present study,  
232 some difficulties were imposed by data availability. Gas-phase measurements of  $\text{NH}_3$  or  $\text{HNO}_3$   
233 were not available for performing “forward” mode calculations in thermodynamic models or gas-  
234 particle phase partitioning calculations, which have been suggested as the best method to predict  
235 pH (Hennigan et al., 2015). Co-located independent measurements of ion concentrations (e.g., by  
236 chromatograph) were not available to confirm the ion balance obtained by AMS measurements  
237 (Figure S7).

238 Bearing these caveats in mind, the analysis presented in the main text using sulfate as a  
239 predictor for IEPOX-SOA was replicated here using pH in place of sulfate. Figure S8 is  
240 analogous to Figure 6a. pH was estimated for IOP1 using AMS measurements of mass  
241 concentrations of inorganic ions (sulfate, ammonium, nitrate, and chloride) and measurements of  
242 RH and temperature. The E-AIM model II (Clegg et al., 1998) was employed. The final pH was  
243 calculated taking into account both the inorganic water predicted by the model and the organic  
244 water estimated from organic hygroscopicity  $\kappa_{\text{org}}$  values (Thalman, in preparation), in a similar  
245 fashion as described by Guo et al. (2015). Figure S8 shows that pH, as calculated herein and for  
246 the caveats herein, does not work well as a predictor for IEPOX-SOA factor loading. Figure S9  
247 is analogous to Figure 7. Figure S9 shows that, although the overall dependencies on  $\text{NO}_y$  are  
248 similar to analysis of the data by sulfate, the separation by pH yields groups that have less  
249 distinct trends and ranges among them.

250 In addition to difficulties associated with generating accurate estimates of pH, there is an  
251 inconsistency between the timescales of estimated particle acidity and IEPOX-SOA factor  
252 loadings that may preclude underlying correlations to emerge. The estimated pH makes use of  
253 instantaneous RH and temperature values and is therefore an instantaneous estimate of pH. They

254 can change in timescales of 15 min or less giving mixing in the boundary layer, for example. On  
255 the other hand, sulfate mass concentrations and IEPOX-SOA factor loadings are variables  
256 representative of processes of longer time scales of hours and days. By not containing any  
257 information on the particle acidity history in the past hours or days, the calculated instantaneous  
258 pH may fail in capturing the true effect of acidity on the chemical formation of IEPOX-derived  
259 PM. The RH cycling history of sulfate particles has been demonstrated to mediate the extent of  
260 IEPOX-derived PM production (Wong et al., 2015). Moreover, sulfate, by being intrinsically  
261 related to particle acidity and at the same time a species of congruent lifetime with secondary  
262 organic material, may in fact be a better proxy to capture the history of particle acidity than  
263 estimates of pH. For these different reasons, sulfate rather than pH is used in the analysis herein.  
264 The understanding, however, is that sulfate represents effects beyond those of the direct chemical  
265 role of sulfate. In analogy to pH, this discussion also extends to the use of sulfate rather than  
266 instantaneous particle water content as the predictor of IEPOX-SOA factor loadings.

#### 267 **S5. Five subsets of data based on NO<sub>y</sub> concentrations**

268 The data subsets and fits shown in Figure 6 are shown in separate panels in Figure S5.  
269 Once a trend of decreasing fit slope with increasing NO<sub>y</sub> concentration was identified, the  
270 number of data subsets was defined as the minimum necessary to have subsets of at least 100  
271 data points (of a total of 888) to allow for robust statistics and that were also cohesive (as  
272 measured by  $R^2$ ) and non-redundant (i.e., of different fit lines).

273 The coloring by date in Figure S5 shows that there is no apparent correlation between  
274 levels of NO<sub>y</sub> concentration or goodness of fit with different time periods within IOP1.  
275 Meteorological variables such as solar radiation, temperature, and RH (not shown) are also not  
276 able to delineate any clear pattern in the data, either within or among groups.

277 Although a linear bivariate statistical analysis for the IEPOX-SOA factor in sulfate and  
278 NO<sub>y</sub> concentrations at first appears attractive, the underlying chemical processes were not linear,  
279 as reflected in the relationship between IEPOX-derived PM and NO<sub>y</sub> concentrations. Moreover,  
280 sulfate and NO<sub>y</sub> concentrations were not independent variables. For these reasons, a linear  
281 bivariate analysis is not appropriate, and a subset analysis was pursued instead.

## 282 **S6. Details and assumptions of the model**

283 The solution to the differential Equation 1 is as follows:

$$284 \quad M(t) = \frac{\alpha_P k_P}{\alpha_L k_L} + e^{\alpha_L k_L t} \left( M_0 - \frac{\alpha_P k_P}{\alpha_L k_L} \right) \quad (S1)$$

285 for which the subscript 0 indicates initial (background) conditions, i.e., immediately before the  
286 air mass passes over Manaus. For the transport from Manaus to T3,  $t = \tau_{tr}$ , and the variable  $M$   
287 represents the IEPOX-derived PM mass concentrations at T3.

288 The zero-order production rate coefficient  $k_P$  and the first-order loss rate coefficient  $k_L$   
289 are lumped parameters representative of several production and loss processes, respectively. A  
290 first assumption is that they are constant over the course of four hours. In hand with that  
291 assumption, a constant boundary layer height throughout the integration time is assumed. The  $\tau$   
292 values represent the time required under afternoon conditions to significantly affect the IEPOX-  
293 derived PM mass concentration by the corresponding processes. For afternoon time periods,  
294 observations show that  $dM/dt > 0$  over tropical forests in the absence of pollution (Chen et al.,  
295 2009; Chen et al., 2015). The parameter  $\tau_P$ , corresponding to a first order process, therefore  
296 represents an instantaneous quantity in the transient system. For simplicity of presentation,  $\tau_P$  is  
297 defined in reference to  $M_0$ , although defining it in relation to  $M_{bg}$  or  $M_{pol}$  does not alter the main  
298 conclusions presented herein.

299 In terms of loss processes, represented by the rate coefficient  $k_L$ , IEPOX-derived PM may  
300 be lost by three main mechanisms: heterogeneous oxidation against OH, condensed-phase  
301 reactions, and dry deposition. The lifetime of IEPOX-derived PM against heterogeneous  
302 oxidation is estimated at around two weeks for an OH concentration of  $10^6$  molecules  $\text{cm}^{-3}$  (Hu et  
303 al., 2016). Lifetime of IEPOX products against particle-phase reactions has not yet been reported  
304 but is expected to be at least several days. A value of one week is used here. The lifetime of PM  
305 against deposition is on the order of a week. The overall loss process is then approximated in the  
306 model as the sum of these three processes, which leads to an estimate of overall loss rate  
307 coefficient  $k_L = 0.015 \text{ h}^{-1}$  (overall characteristic time of 2.8 days).

308 In respect to wet deposition along the track from Manaus to the T3 site, strong convection  
309 imports background regional air, and for this reason strong wet deposition is mathematically  
310 equivalent in the model developed herein to a trajectory that does not pass over Manaus, i.e.,  
311 background conditions. Weak wet deposition represents a mixing of polluted and background air  
312 masses, giving rise to intermediate  $\text{NO}_y$  concentrations. Entrainment on the plume edges as well  
313 as with the free troposphere is mathematically similar to wet deposition in the model framework.  
314 Thus entrainment and wet deposition, without directly contributing to  $k_L$ , are indirectly  
315 incorporated in the developed model based on their effects on  $\text{NO}_y$  concentration.

316 In terms of production processes, represented by the rate coefficient  $k_p$ , IEPOX-derived  
317 PM is produced by multigenerational chemistry of isoprene photooxidation and reactive uptake.  
318 Model Case 1 investigated the sensitivity of pollution enhancement ratio and absolute mass  
319 concentration of IEPOX-derived PM to its production rate coefficient. After constrained by  
320 observations, the estimated interval for  $k_p$  was  $[0.07, 0.13] \mu\text{g m}^{-3} \text{ h}^{-1}$ . In addition, values of  $k_p >$   
321  $0.2 \mu\text{g m}^{-3} \text{ h}^{-1}$  are unlikely given the rare observation ( $<1\%$ ) of  $M_{bg} > 1 \mu\text{g m}^{-3}$ .

322 The obtained range can be compared to estimates of total production rate of organic  
323 material from diameter growth rates. Firstly, a relative production rate of 1:3 for IEPOX-derived  
324 PM to total organic PM is assumed based on the following. IEPOX-derived PM is estimated to  
325 contribute 34% on average to total organic PM in central Amazonia under background  
326 conditions (Chen et al., 2015). For assumptions of equal first order loss rate coefficients for all  
327 organic material, a mass concentration ratio of 1:3 for IEPOX-derived PM to total organic  
328 material implies a ratio of 1:3 in their production rate coefficients  $k_p$ . As a consequence, the  
329 estimated range for total organic material is  $[0.21, 0.39] \mu\text{g m}^{-3} \text{h}^{-1}$ . For the estimate of organic  
330 material production based on growth rates, an average growth rate of  $10 \text{ nm h}^{-1}$  (Kulmala et al.,  
331 2004) is assumed. Further assumptions are a range of particle number concentration of 500 to  
332  $1000 \text{ cm}^{-3}$  and of initial diameter of 20 to 100 nm, typical of background conditions in the  
333 Amazon. The obtained range of organic material production from growth rate estimates is  
334 therefore  $0.02$  to  $0.32 \mu\text{g m}^{-3} \text{h}^{-1}$ , which is comparable to the range constrained by the model.

335 In terms of the influence of Manaus plume on the production and loss processes, the  
336 following assumptions were made. The acceleration of the oxidant cycle in the plume implies  
337 that  $\alpha_L > 1$ . Under plume conditions, OH concentrations observed at the T3 site increased by a  
338 factor of three compared to background conditions (Martin et al., 2016a; Kim, in preparation). A  
339 proportional increase in the loss rate of IEPOX-derived PM by OH heterogeneous chemistry in  
340 the plume is expected. While the OH loss mechanism (of characteristic time of two weeks) is  
341 accelerated by three fold in the plume, dry deposition and condensed phase reactions (both of  
342 assumed characteristic times of a week) are held constant. As a result, the overall loss rate is  
343 enhanced by two fold, i.e.,  $\alpha_L = 2$  is assumed.



344 Concerning the production enhancement factor, the interception of ISOPOO radicals by  
345 NO in the pollution plume as well as the faster consumption of intermediate gas-phase species by  
346 the enhanced OH and O<sub>3</sub> concentrations implies  $\alpha_P < 1$ . The assumption is that the production of  
347 IEPOX almost halts in the plume, and  $\alpha_P = 0.1$ . This assumption is supported by measured gas-  
348 phase concentrations of ISOPOOH at the T3 site, which dropped by 90% when NO<sub>y</sub>  
349 concentrations increased from 0.5 ppb to 2 ppb (Liu et al., 2016). This observation and the  
350 associated model assumption are a reflection of the lifetimes of the chemical species discussed:  
351 in contrast to the abovementioned lifetimes on order of a week for organic particle material  
352 against loss processes, the lifetimes of the gaseous species are significantly shorter. Isoprene and  
353 ISOPOOH have a lifetime on the order of a few hours (Eddingsaas et al., 2010; St. Clair et al.,  
354 2015), and IEPOX has a lifetime of a few hours to a day for an OH concentration of  $10^6$   
355 molecules cm<sup>-3</sup> (Jacobs et al., 2013; Bates et al., 2014).

## Supplementary References

- Bateman, A. P., Nizkorodov, S. A., Laskin, J., and Laskin, A.: Photolytic processing of secondary organic aerosols dissolved in cloud droplets, *Phys. Chem. Chem. Phys.*, 13, 12199-12212, 2011, 10.1039/C1CP20526A.
- Bates, K. H., Crouse, J. D., St. Clair, J. M., Bennett, N. B., Nguyen, T. B., Seinfeld, J. H., Stoltz, B. M., and Wennberg, P. O.: Gas phase production and loss of isoprene epoxydiols, *J. Phys. Chem. A*, 118, 1237-1246, 2014, 10.1021/jp4107958.
- Budisulistiorini, S. H., Canagaratna, M. R., Croteau, P. L., Marth, W. J., Baumann, K., Edgerton, E. S., Shaw, S. L., Knipping, E. M., Worsnop, D. R., Jayne, J. T., Gold, A., and Surratt, J. D.: Real-time continuous characterization of secondary organic aerosol derived from isoprene epoxydiols in downtown Atlanta, Georgia, using the Aerodyne Aerosol Chemical Speciation Monitor, *Environ. Sci. Technol.*, 47, 5686-5694, 2013, 10.1021/es400023n.
- Budisulistiorini, S. H., Li, X., Bairai, S. T., Renfro, J., Liu, Y., Liu, Y. J., McKinney, K. A., Martin, S. T., McNeill, V. F., Pye, H. O. T., Nenes, A., Neff, M. E., Stone, E. A., Mueller, S., Knote, C., Shaw, S. L., Zhang, Z., Gold, A., and Surratt, J. D.: Examining the effects of anthropogenic emissions on isoprene-derived secondary organic aerosol formation during the 2013 Southern Oxidant and Aerosol Study (SOAS) at the Look Rock, Tennessee ground site, *Atmos. Chem. Phys.*, 15, 8871-8888, 2015, 10.5194/acp-15-8871-2015.
- Canagaratna, M. R., Jayne, J. T., Jimenez, J. L., Allan, J. D., Alfarra, M. R., Zhang, Q., Onasch, T. B., Drewnick, F., Coe, H., Middlebrook, A., Delia, A., Williams, L. R., Trimborn, A. M., Northway, M. J., DeCarlo, P. F., Kolb, C. E., Davidovits, P., and Worsnop, D. R.: Chemical and microphysical characterization of ambient aerosols with the aerodyne

- aerosol mass spectrometer, *Mass Spectrom. Rev.*, 26, 185-222, 2007,  
10.1002/mas.20115.
- Canagaratna, M. R., Jimenez, J. L., Kroll, J. H., Chen, Q., Kessler, S. H., Massoli, P.,  
Hildebrandt Ruiz, L., Fortner, E., Williams, L. R., Wilson, K. R., Surratt, J. D., Donahue,  
N. M., Jayne, J. T., and Worsnop, D. R.: Elemental ratio measurements of organic  
compounds using aerosol mass spectrometry: characterization, improved calibration, and  
implications, *Atmos. Chem. Phys.*, 15, 253-272, 2015, 10.5194/acp-15-253-2015.
- Chen, Q., Farmer, D. K., Schneider, J., Zorn, S. R., Heald, C. L., Karl, T. G., Guenther, A.,  
Allan, J. D., Robinson, N., Coe, H., Kimmel, J. R., Pauliquevis, T., Borrmann, S., Pöschl,  
U., Andreae, M. O., Artaxo, P., Jimenez, J. L., and Martin, S. T.: Mass spectral  
characterization of submicron biogenic organic particles in the Amazon Basin, *Geophys.  
Res. Lett.*, 36, L20806, 2009, 10.1029/2009GL039880.
- Chen, Q., Farmer, D. K., Rizzo, L. V., Pauliquevis, T., Kuwata, M., Karl, T. G., Guenther, A.,  
Allan, J. D., Coe, H., Andreae, M. O., Pöschl, U., Jimenez, J. L., Artaxo, P., and Martin,  
S. T.: Submicron particle mass concentrations and sources in the Amazonian wet season  
(AMAZE-08), *Atmos. Chem. Phys.*, 15, 3687-3701, 2015, 10.5194/acp-15-3687-2015.
- Clegg, S. L., Brimblecombe, P., and Wexler, A. S.: Thermodynamic model of the system  $\text{H}^+$ -  
 $\text{NH}_4^+$ - $\text{SO}_4^{2-}$ - $\text{NO}_3^-$ - $\text{H}_2\text{O}$  at tropospheric temperatures, *J. Phys. Chem. A*, 102, 2137-2154,  
1998, 10.1021/jp973042r.
- de Sá, S. S.: Sources and composition of submicron particulate matter in Amazonia as affected  
by anthropogenic emissions during the wet and dry season, in preparation.
- DeCarlo, P. F., Kimmel, J. R., Trimborn, A., Northway, M. J., Jayne, J. T., Aiken, A. C., Gonin,  
M., Fuhrer, K., Horvath, T., Docherty, K. S., Worsnop, D. R., and Jimenez, J. L.: Field-

- deployable, high-resolution, time-of-flight aerosol mass spectrometer, *Anal. Chem.*, 78, 8281-8289, 2006, 10.1021/ac061249n.
- Eddingsaas, N. C., VanderVelde, D. G., and Wennberg, P. O.: Kinetics and products of the acid-catalyzed ring-opening of atmospherically relevant butyl epoxy alcohols, *J. Phys. Chem. A*, 114, 8106-8113, 2010, 10.1021/jp103907c.
- Epstein, S. A., Blair, S. L., and Nizkorodov, S. A.: Direct photolysis of  $\alpha$ -pinene ozonolysis secondary organic aerosol: effect on particle mass and peroxide content, *Environ. Sci. Technol.*, 48, 11251-11258, 2014, 10.1021/es502350u.
- Guo, H., Xu, L., Bougiatioti, A., Cerully, K. M., Capps, S. L., Hite Jr, J. R., Carlton, A. G., Lee, S. H., Bergin, M. H., Ng, N. L., Nenes, A., and Weber, R. J.: Fine-particle water and pH in the southeastern United States, *Atmos. Chem. Phys.*, 15, 5211-5228, 2015, 10.5194/acp-15-5211-2015
- Hu, W. W., Campuzano-Jost, P., Palm, B. B., Day, D. A., Ortega, A. M., Hayes, P. L., Krechmer, J. E., Chen, Q., Kuwata, M., Liu, Y. J., de Sá, S. S., McKinney, K., Martin, S. T., Hu, M., Budisulistiorini, S. H., Riva, M., Surratt, J. D., St. Clair, J. M., Isaacman-Van Wertz, G., Yee, L. D., Goldstein, A. H., Carbone, S., Brito, J., Artaxo, P., de Gouw, J. A., Koss, A., Wisthaler, A., Mikoviny, T., Karl, T., Kaser, L., Jud, W., Hansel, A., Docherty, K. S., Alexander, M. L., Robinson, N. H., Coe, H., Allan, J. D., Canagaratna, M. R., Paulot, F., and Jimenez, J. L.: Characterization of a real-time tracer for isoprene epoxydiols-derived secondary organic aerosol (IEPOX-SOA) from aerosol mass spectrometer measurements, *Atmos. Chem. Phys.*, 15, 11807-11833, 2015, 10.5194/acp-15-11807-2015.

- Hu, W. W., Palm, B., Day, D., Campuzano-Jost, P., Krechmer, J., Peng, Z., De Sá, S. S., Martin, S. T., Alexander, M. L., Baumann, K., Hacker, L., Kiendler-Scharr, A., Koss, A., De Gouw, J., Goldstein, A. H., Seco, R., Sjostedt, S., Park, J.-H., Guenther, A., Kim, S., Canonaco, F., Prevot, A., Brune, W., and Jimenez, J. L.: Long lifetime of ambient isoprene epoxydiols-derived Secondary Organic Aerosol (IEPOX-SOA) against OH oxidation and evaporation, *Atmos. Chem. Phys. Disc.*, 2016, doi: 10.5194/acp-2016-418.
- Isaacman-VanWertz, G. and Sueper, D.: TERN: TAG ExploreR and iNtegration  
<https://sites.google.com/site/terninigor/>.
- Isaacman-VanWertz, G., Yee, L. D., Kreisberg, N. M., Wernis, R., Moss, J. A., Hering, S. V., de Sá, S. S., Martin, S. T., Alexander, M. L., Palm, B. B., Hu, W., Campuzano-Jost, P., Day, D. A., Jimenez, J. L., Riva, M., Surratt, J. D., Viegas, J., Manzi, A., Edgerton, E., Baumann, K., Souza, R., Artaxo, P., and Goldstein, A. H.: Ambient Gas-Particle Partitioning of Tracers for Biogenic Oxidation, *Env. Sci. Technol.*, 2016, 10.1021/acs.est.6b01674.
- Isaacman, G., Kreisberg, N., Yee, L., Worton, D., Chan, A., Moss, J., Hering, S., and Goldstein, A.: Online derivatization for hourly measurements of gas-and particle-phase semi-volatile oxygenated organic compounds by thermal desorption aerosol gas chromatography (SV-TAG), *Atmos. Meas. Tech.*, 7, 4417-4429, 2014, 10.5194/amt-7-4417-2014.
- Jacobs, M. I., Darer, A. I., and Elrod, M. J.: Rate constants and products of the OH reaction with isoprene-derived epoxides, *Environ. Sci. Technol.*, 47, 12868-12876, 2013, 10.1021/es403340g.
- Jaoui, M., Kleindienst, T., Lewandowski, M., Offenberg, J., and Edney, E.: Identification and quantification of aerosol polar oxygenated compounds bearing carboxylic or hydroxyl

groups. 2. Organic tracer compounds from monoterpenes, *Environ. Sci. Technol.*, 39, 5661-5673, 2005, 10.1021/es048111b.

Jimenez, J. L., Canagaratna, M. R., Donahue, N. M., Prevot, A. S. H., Zhang, Q., Kroll, J. H., DeCarlo, P. F., Allan, J. D., Coe, H., Ng, N. L., Aiken, A. C., Docherty, K. S., Ulbrich, I. M., Grieshop, A. P., Robinson, A. L., Duplissy, J., Smith, J. D., Wilson, K. R., Lanz, V. A., Hueglin, C., Sun, Y. L., Tian, J., Laaksonen, A., Raatikainen, T., Rautiainen, J., Vaattovaara, P., Ehn, M., Kulmala, M., Tomlinson, J. M., Collins, D. R., Cubison, M. J., Dunlea, J., Huffman, J. A., Onasch, T. B., Alfarra, M. R., Williams, P. I., Bower, K., Kondo, Y., Schneider, J., Drewnick, F., Borrmann, S., Weimer, S., Demerjian, K., Salcedo, D., Cottrell, L., Griffin, R., Takami, A., Miyoshi, T., Hatakeyama, S., Shimo, A., Sun, J. Y., Zhang, Y. M., Dzepina, K., Kimmel, J. R., Sueper, D., Jayne, J. T., Herndon, S. C., Trimborn, A. M., Williams, L. R., Wood, E. C., Middlebrook, A. M., Kolb, C. E., Baltensperger, U., and Worsnop, D. R.: Evolution of organic aerosols in the atmosphere, *Science*, 326, 1525-1529, 2009, 10.1126/science.1180353.

Kim, S., in preparation.

Kroll, J. H., Smith, J. D., Che, D. L., Kessler, S. H., Worsnop, D. R., and Wilson, K. R.: Measurement of fragmentation and functionalization pathways in the heterogeneous oxidation of oxidized organic aerosol, *Phys. Chem. Chem. Phys.*, 11, 8005-8014, 2009, 10.1039/B905289E.

Kulmala, M., Vehkamäki, H., Petäjä, T., Dal Maso, M., Lauri, A., Kerminen, V. M., Birmili, W., and McMurry, P. H.: Formation and growth rates of ultrafine atmospheric particles: a review of observations, *J. Aerosol Sci.*, 35, 143-176, 2004, <http://dx.doi.org/10.1016/j.jaerosci.2003.10.003>.

- Kuwata, M., Zorn, S. R., and Martin, S. T.: Using elemental ratios to predict the density of organic material composed of carbon, hydrogen, and oxygen, *Environ. Sci. Technol.*, 46, 787-794, 2011, 10.1021/es202525q.
- Kuwata, M., Liu, Y., McKinney, K., and Martin, S. T.: Physical state and acidity of inorganic sulfate can regulate the production of secondary organic material from isoprene photooxidation products, *Phys. Chem. Chem. Phys.*, 17, 5670-5678, 2015, 10.1039/C4CP04942J.
- Lewandowski, M., Jaoui, M., Offenberg, J., Krug, J., and Kleindienst, T.: Atmospheric oxidation of isoprene and 1, 3-butadiene: influence of aerosol acidity and relative humidity on secondary organic aerosol, *Atmos. Chem. Phys.*, 15, 3773-3783, 2015, 10.5194/acp-15-3773-2015.
- Lin, Y.-H., Knipping, E., Edgerton, E., Shaw, S., and Surratt, J. D.: Investigating the influences of SO<sub>2</sub> and NH<sub>3</sub> levels on isoprene-derived secondary organic aerosol formation using conditional sampling approaches, *Atmos. Chem. Phys.*, 13, 8457-8470, 2013, 10.5194/acp-13-8457-2013.
- Liu, Y., Kuwata, M., Strick, B. F., Geiger, F. M., Thomson, R. J., McKinney, K. A., and Martin, S. T.: Uptake of epoxydiol isomers accounts for half of the particle-phase material produced from isoprene photooxidation via the HO<sub>2</sub> pathway, *Environ. Sci. Technol.*, 49, 250-258, 2015, 10.1021/es5034298.
- Liu, Y., Brito, J., Dorris, M. R., Rivera-Rios, J. C., Seco, R., Bates, K. H., Artaxo, P., Duvoisin, S., Keutsch, F. N., Kim, S., Goldstein, A. H., Guenther, A. B., Manzi, A. O., Souza, R. A. F., Springston, S. R., Watson, T. B., McKinney, K. A., and Martin, S. T.: Isoprene

photochemistry over the Amazon rain forest, *Proc. Natl. Acad. Sci. USA*, 113, 6125-6130, 2016, 10.1073/pnas.1524136113.

Lopez-Hilfiker, F. D., Mohr, C., D'Ambro, E. L., Lutz, A., Riedel, T. P., Gaston, C. J., Iyer, S., Zhang, Z., Gold, A., Surratt, J. D., Lee, B. H., Kurten, T., Hu, W. W., Jimenez, J., Hallquist, M., and Thornton, J. A.: Molecular composition and volatility of organic aerosol in the Southeastern US: implications for IEPOX derived SOA, *Environ. Sci. Technol.*, 2200–2209, 2016, 10.1021/acs.est.5b04769.

Martin, S. T., Artaxo, P., Machado, L., Manzi, A. O., Souza, R. A. F., Schumacher, C., Wang, J., Biscaro, T., Brito, J., Calheiros, A., Jardine, K., Medeiros, A., Portela, B., Sá, S. S. d., Adachi, K., Aiken, A. C., Albrecht, R., Alexander, L., Andreae, M. O., Barbosa, H. M. J., Buseck, P., Chand, D., Comstock, J. M., Day, D. A., Dubey, M., Fan, J., Fast, J., Fisch, G., Fortner, E., Giangrande, S., Gilles, M., Goldstein, A. H., Guenther, A., Hubbe, J., Jensen, M., Jimenez, J. L., Keutsch, F. N., Kim, S., Kuang, C., Laskin, A., McKinney, K., Mei, F., Miller, M., Nascimento, R., Pauliquevis, T., Pekour, M., Peres, J., Petäjä, T., Pöhlker, C., Pöschl, U., Rizzo, L., Schmid, B., Shilling, J. E., Dias, M. A. S., Smith, J. N., Tomlinson, J. M., Tóta, J., and Wendisch, M.: The Green ocean Amazon Experiment (GoAmazon2014/5) observes pollution affecting gases, aerosols, clouds, and rainfall over the rain forest, *B. Am. Meteorol. Soc.*, 2016a, doi:10.1175/BAMS-D-15-00221.1.

Martin, S. T., Artaxo, P., Machado, L. A. T., Manzi, A. O., Souza, R. A. F., Schumacher, C., Wang, J., Andreae, M. O., Barbosa, H. M. J., Fan, J., Fisch, G., Goldstein, A. H., Guenther, A., Jimenez, J. L., Pöschl, U., Silva Dias, M. A., Smith, J. N., and Wendisch, M.: Introduction: observations and modeling of the green ocean Amazon



- (GoAmazon2014/5), *Atmos. Chem. Phys.*, 16, 4785-4797, 2016b, 10.5194/acp-16-4785-2016.
- Ng, N., Canagaratna, M., Jimenez, J., Chhabra, P., Seinfeld, J., and Worsnop, D.: Changes in organic aerosol composition with aging inferred from aerosol mass spectra, *Atmos. Chem. Phys.*, 11, 6465-6474, 2011, 10.5194/acp-11-6465-2011.
- Nguyen, T. B., Coggon, M. M., Bates, K. H., Zhang, X., Schwantes, R. H., Schilling, K. A., Loza, C. L., Flagan, R. C., Wennberg, P. O., and Seinfeld, J. H.: Organic aerosol formation from the reactive uptake of isoprene epoxydiols (IEPOX) onto non-acidified inorganic seeds, *Atmos. Chem. Phys.*, 14, 3497-3510, 2014, 10.5194/acp-14-3497-2014.
- Riva, M., Budisulistiorini, S. H., Chen, Y., Zhang, Z., D'Ambro, E. L., Zhang, X., Gold, A., Turpin, B. J., Thornton, J. A., Canagaratna, M. R., and Surratt, J. D.: Chemical characterization of secondary organic aerosol from oxidation of isoprene hydroxyhydroperoxides, *Environ. Sci. Technol.*, 2016, 10.1021/acs.est.6b02511.
- St. Clair, J. M., Rivera-Rios, J. C., Crouse, J. D., Knap, H. C., Bates, K. H., Teng, A. P., Jørgensen, S., Kjaergaard, H. G., Keutsch, F. N., and Wennberg, P. O.: Kinetics and products of the reaction of the first-generation isoprene hydroxy hydroperoxide (ISOPOOH) with OH, *J. Phys. Chem. A*, 2015, 10.1021/acs.jpca.5b06532.
- Surratt, J. D., Lewandowski, M., Offenberg, J. H., Jaoui, M., Kleindienst, T. E., Edney, E. O., and Seinfeld, J. H.: Effect of acidity on secondary organic aerosol formation from isoprene, *Environ. Sci. Technol.*, 41, 5363-5369, 2007a, 10.1021/es0704176.
- Surratt, J. D., Kroll, J. H., Kleindienst, T. E., Edney, E. O., Claeys, M., Sorooshian, A., Ng, N. L., Offenberg, J. H., Lewandowski, M., Jaoui, M., Flagan, R. C., and Seinfeld, J. H.:

- Evidence for organosulfates in secondary organic aerosol, *Environ. Sci. Technol.*, 41, 517-527, 2007b, 10.1021/es062081q.
- Thalman, R., in preparation.
- Ulbrich, I., Canagaratna, M., Zhang, Q., Worsnop, D., and Jimenez, J.: Interpretation of organic components from Positive Matrix Factorization of aerosol mass spectrometric data, *Atmos. Chem. Phys.*, 9, 2891-2918, 2009, 10.5194/acp-9-2891-2009.
- Wong, J. P., Lee, A. K., and Abbatt, J. P.: Impacts of Sulfate Seed Acidity and Water Content on Isoprene Secondary Organic Aerosol Formation, *Environ. Sci. Technol.*, 49, 13215-13221, 2015, 10.1021/acs.est.5b02686.
- Worton, D. R., Surratt, J. D., LaFranchi, B. W., Chan, A. W. H., Zhao, Y., Weber, R. J., Park, J.-H., Gilman, J. B., de Gouw, J., Park, C., Schade, G., Beaver, M., Clair, J. M. S., Crouse, J., Wennberg, P., Wolfe, G. M., Harrold, S., Thornton, J. A., Farmer, D. K., Docherty, K. S., Cubison, M. J., Jimenez, J.-L., Frossard, A. A., Russell, L. M., Kristensen, K., Glasius, M., Mao, J., Ren, X., Brune, W., Browne, E. C., Pusede, S. E., Cohen, R. C., Seinfeld, J. H., and Goldstein, A. H.: Observational insights into aerosol formation from isoprene, *Environ. Sci. Technol.*, 47, 11403-11413, 2013, 10.1021/es4011064.
- Xu, L., Guo, H., Boyd, C. M., Klein, M., Bougiatioti, A., Cerully, K. M., Hite, J. R., Isaacman-VanWertz, G., Kreisberg, N. M., Knote, C., Olson, K., Koss, A., Goldstein, A. H., Hering, S. V., de Gouw, J., Baumann, K., Lee, S.-H., Nenes, A., Weber, R. J., and Ng, N. L.: Effects of anthropogenic emissions on aerosol formation from isoprene and monoterpenes in the southeastern United States, *Proc. Natl. Acad. Sci. USA*, 112, 37-42, 2015, 10.1073/pnas.1417609112.

Zhang, Q., Alfarra, M. R., Worsnop, D. R., Allan, J. D., Coe, H., Canagaratna, M. R., and Jimenez, J. L.: Deconvolution and quantification of hydrocarbon-like and oxygenated organic aerosols based on aerosol mass spectrometry, *Environ. Sci. Technol.*, 39, 4938-4952, 2005, 10.1021/es048568l.

Zhang, X., Smith, K. A., Worsnop, D. R., Jimenez, J. L., Jayne, J. T., Kolb, C. E., Morris, J., and Davidovits, P.: Numerical characterization of particle beam collimation: part II integrated aerodynamic-lens–nozzle system, *Aerosol Sci. Technol.*, 38, 619-638, 2004, 10.1080/02786820490479833.

## List of Supplementary Figures

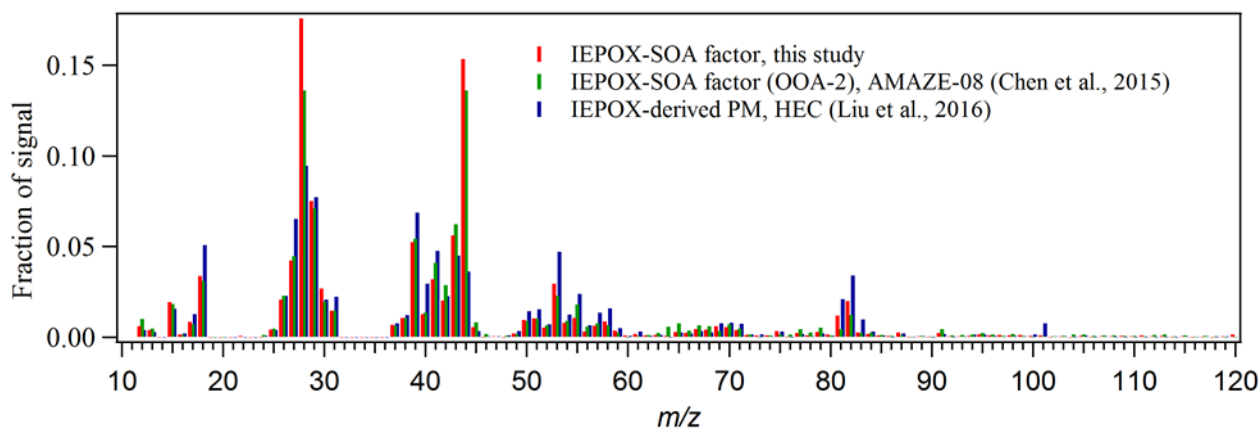

**Figure S1.** Profile of the IEPOX-SOA factor resolved by PMF analysis of the time series of AMS organic mass spectra collected in the wet season of 2014 (IOP1) at the T3 site (red), and in the wet season of 2008 (green) as part of AMAZE-08 experiment at the T0t site (Chen et al., 2015). Also plotted is the mass spectrum of secondary organic material produced in the Harvard Environmental Chamber from  $\beta$ -IEPOX photooxidation onto acidic ammonium sulfate seed particles under  $\text{HO}_2$ -dominant conditions and  $\text{RH} < 5\%$  (blue) (Liu et al., 2015). Pearson correlation coefficients  $R$  between the PMF factor of this study and the other spectra were:  $R = 0.99$  for the AMAZE-08 PMF factor,  $R = 0.81$  for the chamber spectrum with all ions included, and  $R = 0.95$  for the chamber spectrum with  $m/z$  44 and 28 excluded.

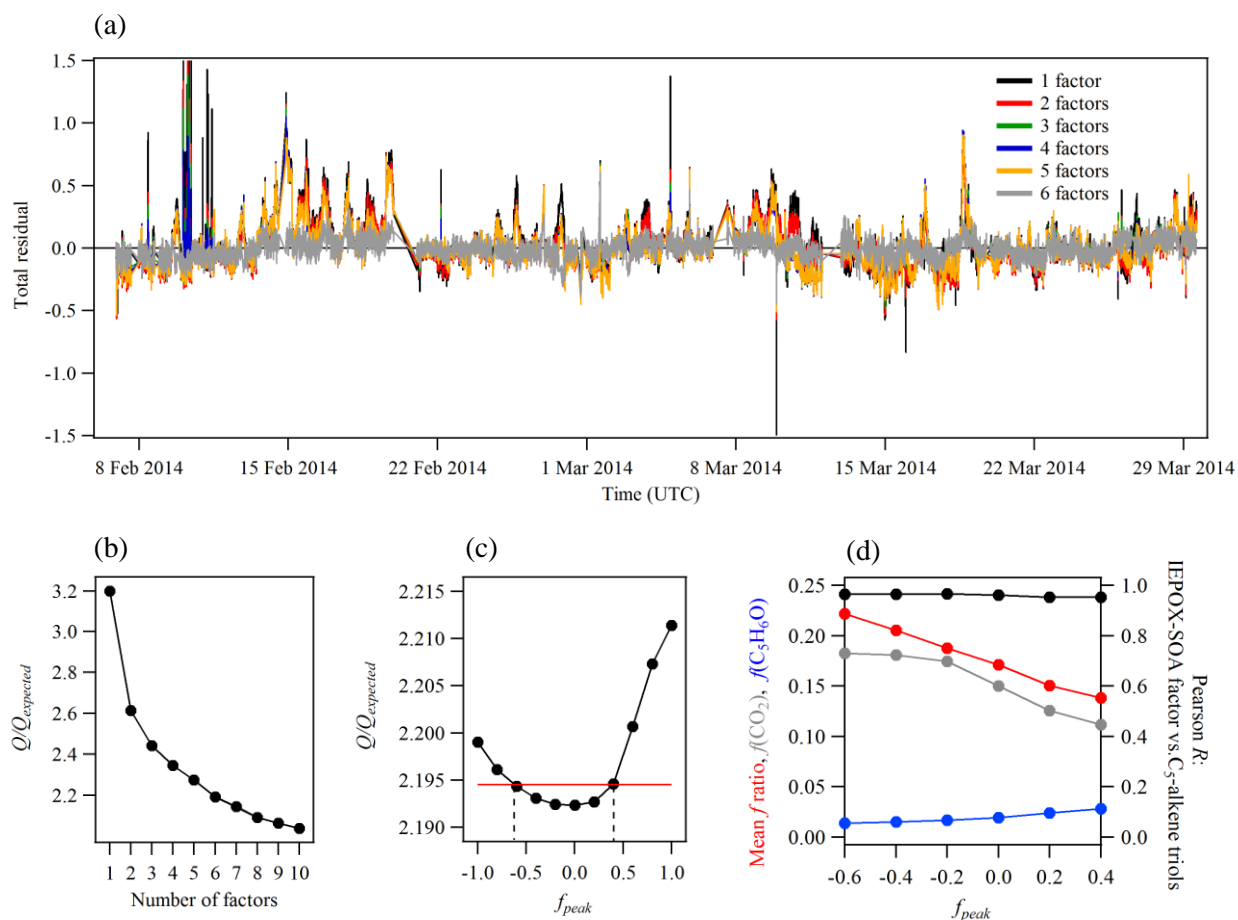

**Figure S2.** (a) Time series of total ion residuals of PMF solutions from one to six factors, (b) Dependence of the quality-of-fit parameter  $Q/Q_{expected}$  on the number of factors for  $f_{peak} = 0$ , (c) Dependence of the quality-of-fit parameter  $Q/Q_{expected}$  on  $f_{peak}$  for number of factors = 6. The red line represents  $Q/Q_{expected}$  that exceeds in 0.1% the minimum value at  $f_{peak} = 0$ . This limit determines the range of plausible  $f_{peak}$  values as indicated by the dashed black lines, (d) For the six-factor solution, dependence on the  $f_{peak}$  parameter of the Pearson correlation coefficient  $R$  between the IEPOX-SOA factor loadings and independently measured  $C_5$ -alkene triols (on the right vertical axis), the mean  $f$  ratio of IEPOX-SOA factor loading to total organic PM mass concentration, and the relative intensities  $f(CO_2)$  and  $f(C_5H_6O)$  of the ions  $CO_2^+$  and  $C_5H_6O^+$ , respectively (on the left vertical axis).

(a) 3 March 2014

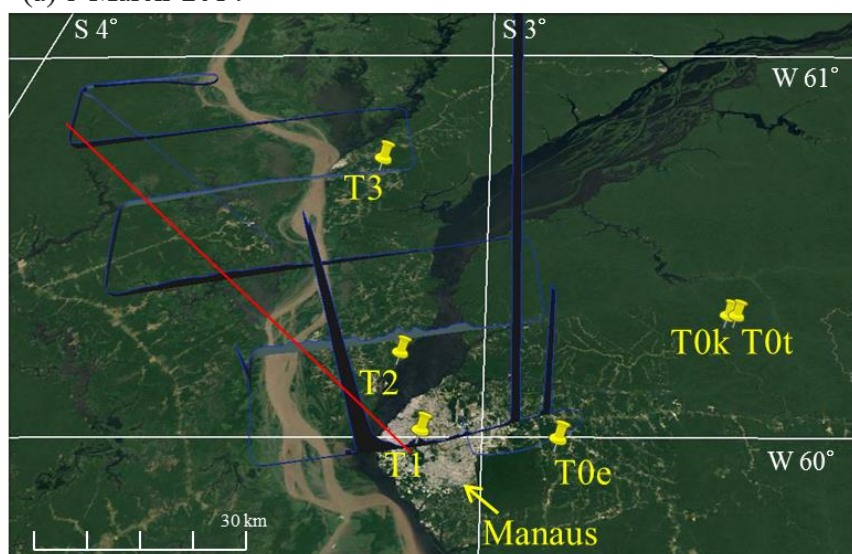

(b) 13 March 2014

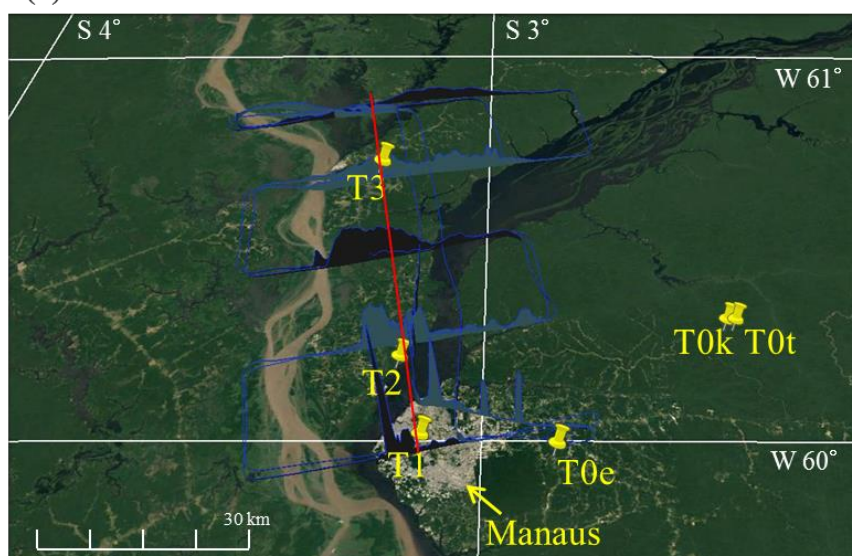

**Figure S3.** Visualization of the Manaus pollution plume for (a) March 3, 2014, 17:45 – 19:26 UTC, and (b) March 13, 2014, 14:14 – 17:21 UTC. The direction and extent of the plume observed within the boundary layer in the Manaus environs by the G-1 aircraft is represented by plotting  $\text{NO}_y$  concentrations on a vertical axis (0.13 to 369 ppb on March 3 and 0.10 to 75 ppb on March 13). The red lines guide the eye through the central axis of the plume. An image of land cover is in the horizontal plane. Yellow pins indicate the locations of some of the GoAmazon2014/5 research sites, including T3 (Martin et al., 2016b).

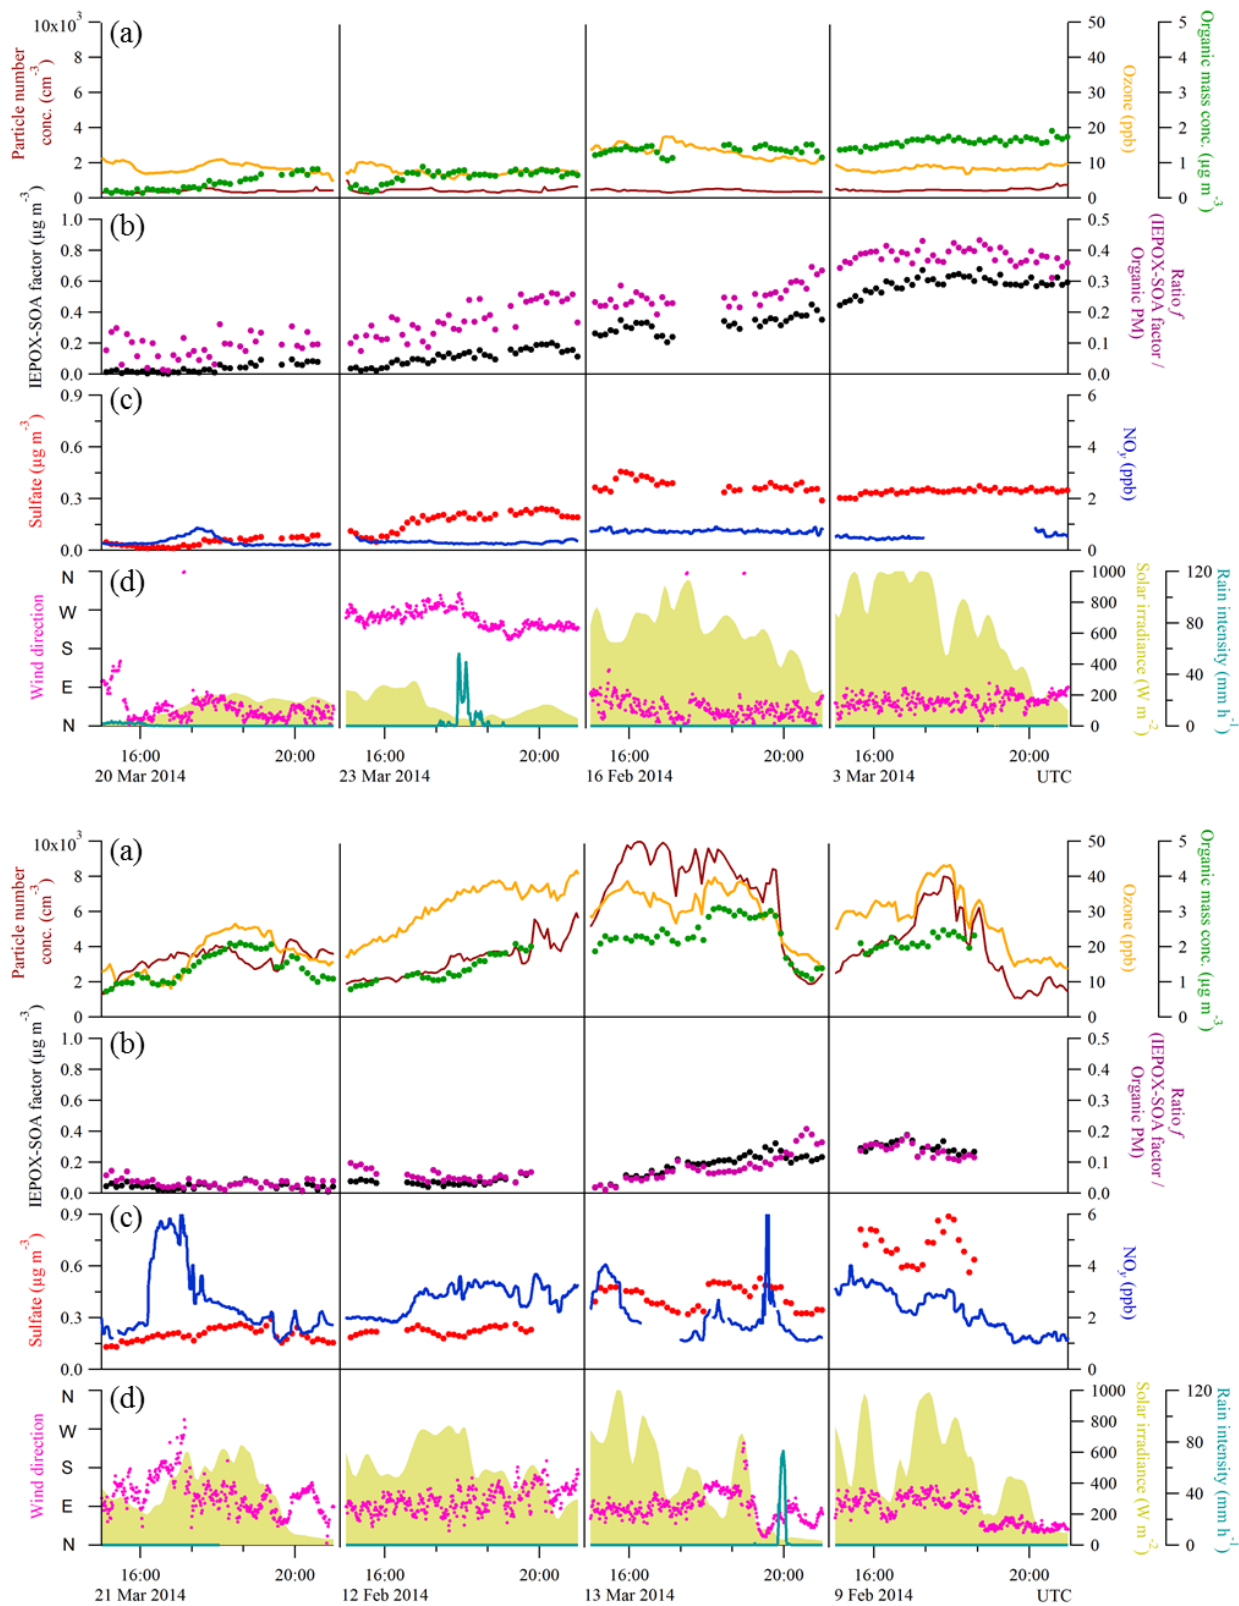

**Figure S4.** Selected cases of data sets collected during background and polluted conditions (top and bottom panels, respectively) as observed during afternoons at the T3 site.

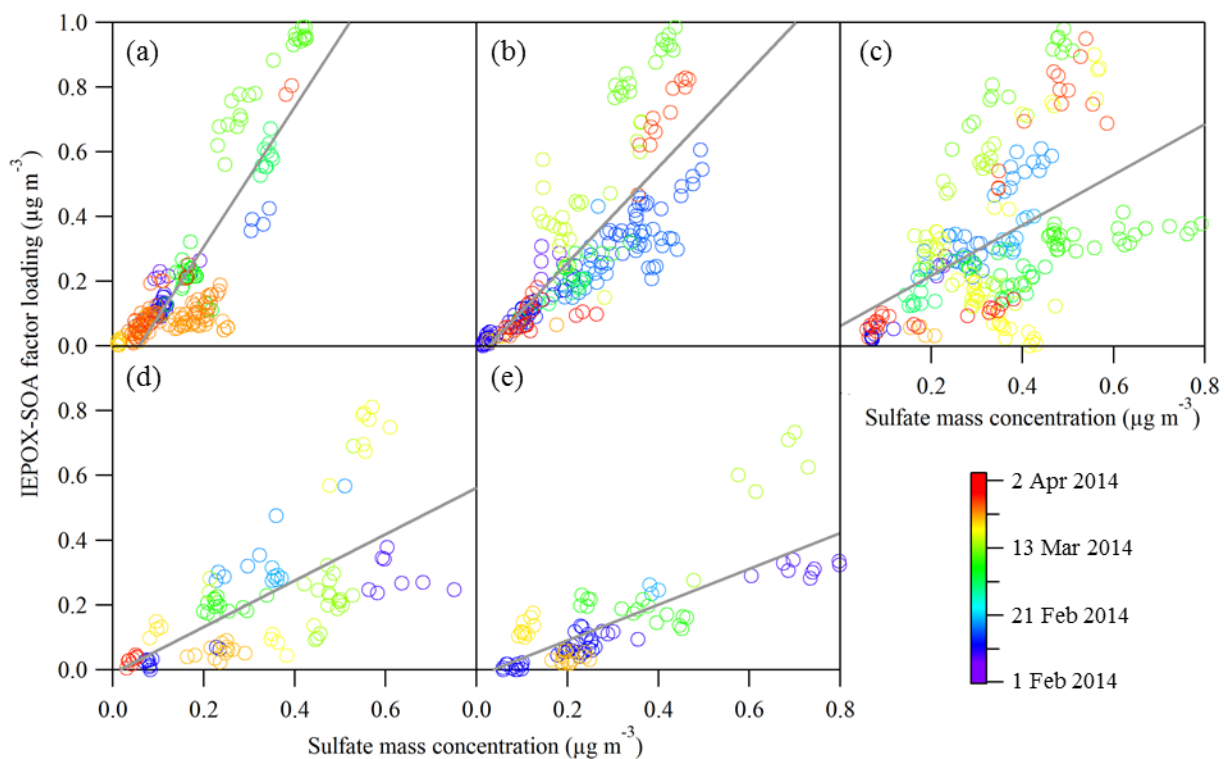

**Figure S5.** Scatter plots of sulfate mass concentration and IEPOX-SOA factor loading for local afternoon (12:00-16:00 local time; 16:00-20:00 UTC) for five different ranges of  $\text{NO}_y$  concentrations. Panels a-e correspond to groups labeled 1-5 according to Table 1. Table 1 presents the parameters of the six least-squares linear fits represented by the lines in the figure. Data is colored by date.



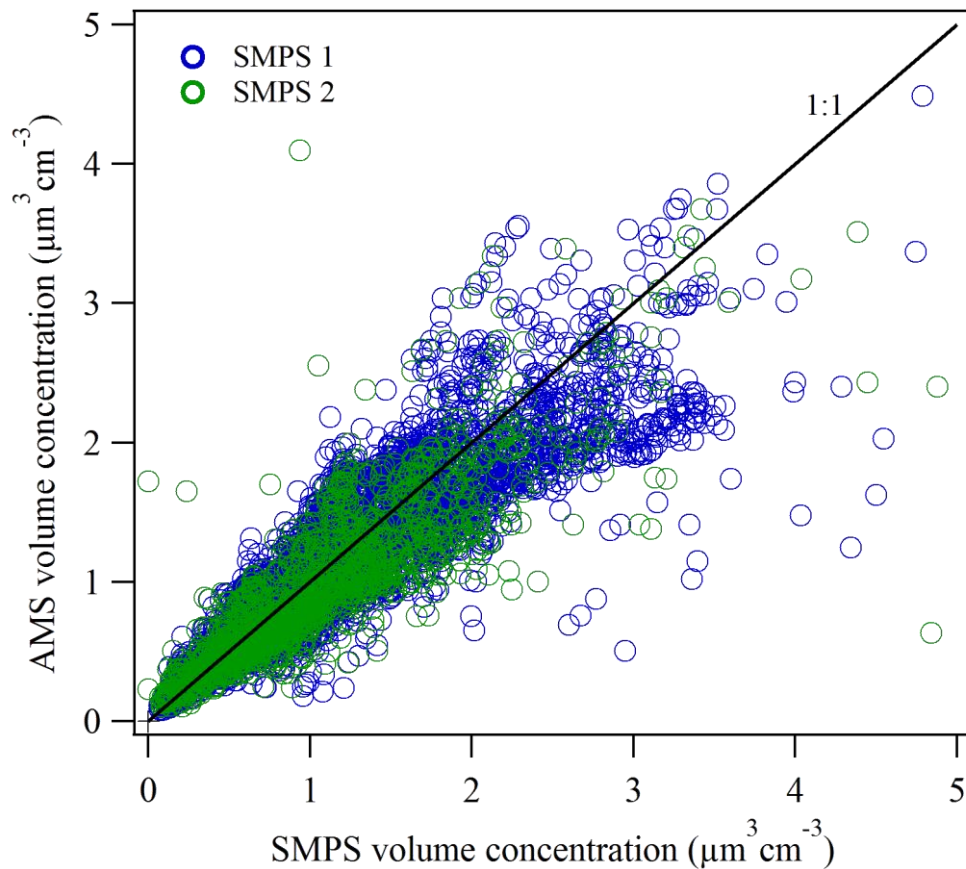

**Figure S6.** Scatter plot of AMS PM volume concentrations and SMPS PM volume concentrations. SMPS1 measured particles having mobility diameters of 10 to 461 nm from February 7 to March 28, 2014. SMPS2 measured particles having mobility diameters of 10 to 510 nm from February 24 to March 30. Material densities used in the calculation of AMS volume from AMS mass were based on a mixing rule for the five AMS-measured species. The material density of the organic component was calculated following the method of Kuwata et al. (2011) based on O:C and H:C values, which in turn were calculated following the method of Canagaratna et al. (2015).

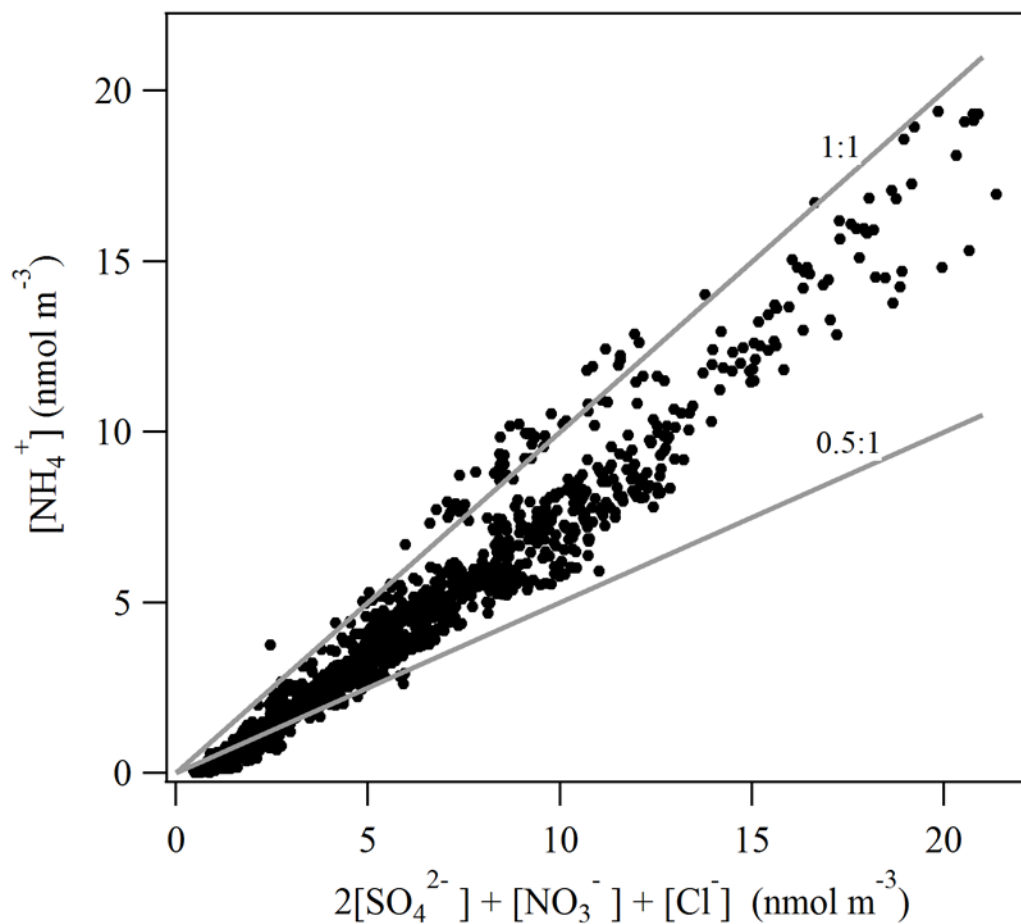

**Figure S7.** Ion balance for AMS measured species. A scatter plot is shown of mass concentrations of cations on the ordinate and of anions on the abscissa. Solid gray lines indicate relationships of 1:1 and 0.5:1.

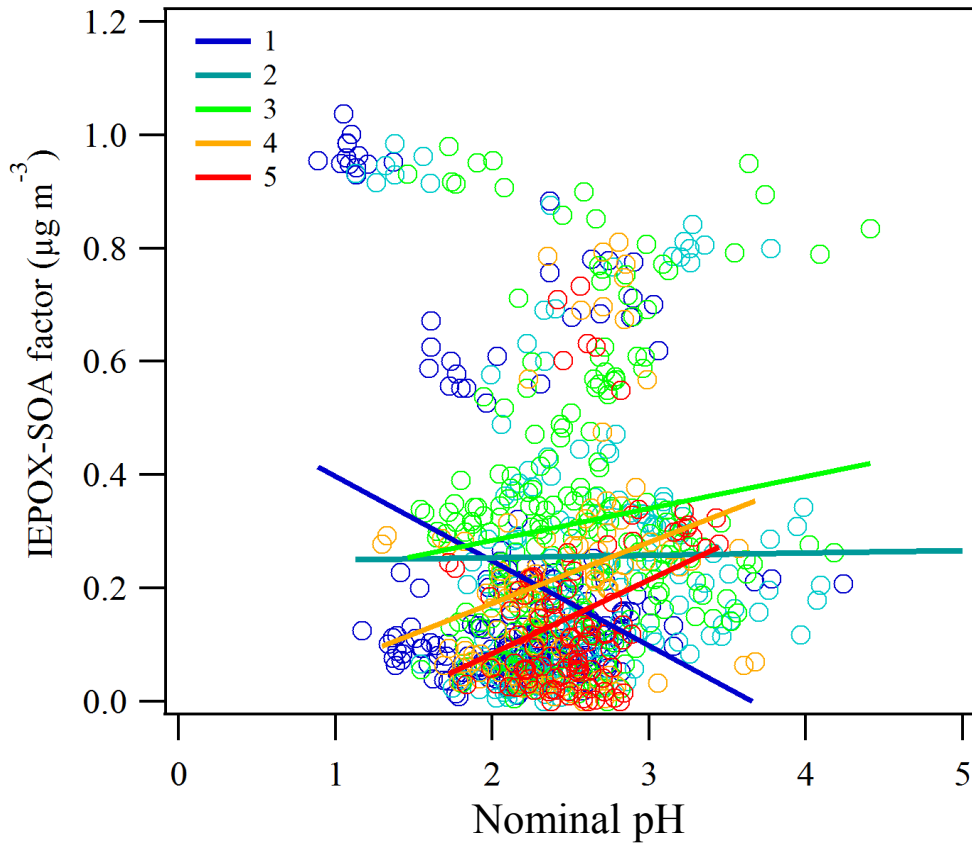

**Figure S8.** Scatter plot of estimated pH and IEPOX-SOA factor loading for local afternoon (12:00-16:00 local time; 16:00-20:00 UTC). The data sets were collected into five subsets, colored and labeled 1 to 5, based on  $\text{NO}_y$  concentration (analogous to analysis shown in Figure 6a).

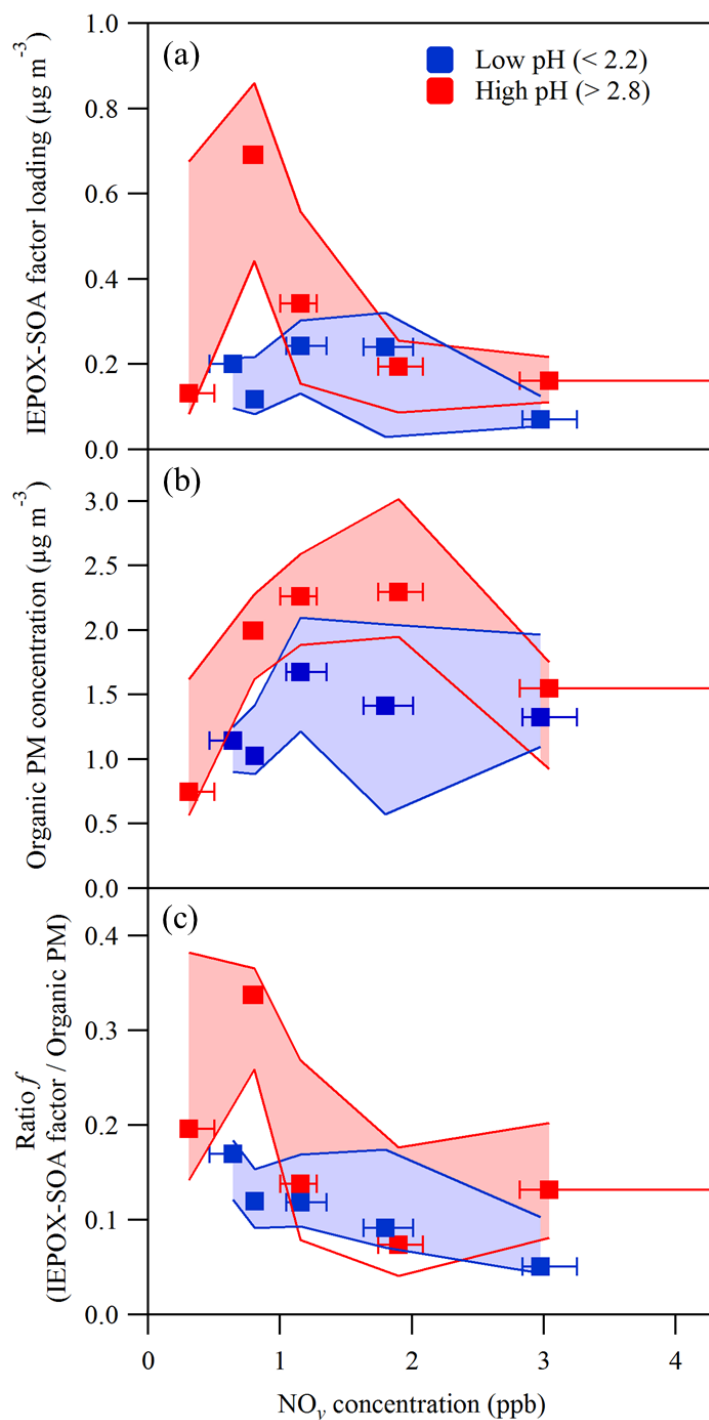

**Figure S9.** Dependence on  $\text{NO}_y$  concentration of (a) IEPOX-SOA factor loading, (b) organic mass concentration, and (c) the ratio  $f$  of the IEPOX-SOA factor loading to the organic PM concentration. Data are segregated by low ( $< 2.2$ ) and high ( $> 2.8$ ) pH and grouped into five levels of  $\text{NO}_y$  concentration (Figure 7). Squares represent medians of each group. Interquartile ranges are represented by whiskers along the abscissa and shading along the ordinate. The plotted data sets were recorded during local afternoon (12:00-16:00 local time; 16:00-20:00 UTC).
